# Supplementary material for: Improving the performance of acrylic-epoxy ester hybrid coatings with phosphate monomers
Source: Royal Society of Chemistry journal article supplement (doi:10.1039/d4py00131a), 2024-01-01
Supplement: d4py00131a1.pdf [file d4py00131a1.pdf]

**Supplementary information file for:**

**Improving the performance of acrylic-epoxy ester hybrid  
coatings with phosphate monomers**

Xiaomei Wang,<sup>a</sup> Mike Tebyetekerwa,<sup>b\*</sup> Yujian Chen,<sup>a</sup> Xin Sun,<sup>a</sup> Weiwei Cong<sup>c</sup>, Xiao  
Wang,<sup>c</sup> Lizhuang Chen,<sup>a</sup> Zhaolei Li,<sup>a</sup> Taijiang Gui,<sup>c\*</sup> and Weili Li,<sup>a\*</sup>

<sup>a</sup> School of Materials Science and Engineering, Jiangsu University of Science  
and Technology, Zhenjiang, 212100, China

<sup>b</sup> Dow Centre for Sustainable Engineering Innovation, School of Chemical  
Engineering, The University of Queensland, St. Lucia, Brisbane, QLD 4072 Australia

<sup>c</sup> State Key Laboratory of Marine Coatings, Marine Chemical Research Institute  
Co., Ltd. Qingdao, 266000, China.

\*Corresponding authors

Email: m.tebyetekerwa@uq.edu.au(Dr Mike Tebyetekerwa);  
tjgui@163.com(Dr Taijiang Gui); liweili@just.edu.cn(Prof. Weili Li)

---

Table S1 Formulation of Vegetable Oil Acid Modified Epoxy Resin

| Ingredients                           | Relative amount (%) |
|---------------------------------------|---------------------|
| Eleostearic acid (278.43)             | 2%                  |
| Linoleic acid (280.45)                | 23%                 |
| Dibutyltin dilaurate<br>(DBTDL)       | 0.1%                |
| Epoxy resin E12                       | 30%                 |
| Epoxy resin E06                       | 16%                 |
| Butyl acetate (BA)                    | 4%                  |
| Propylene glycol methyl ether<br>(PM) | 22%                 |
| n-Butanol                             | 4%                  |
| Zinc oxide                            | 0.1%                |

---

---

Table S2 Synthetic formulation of modified acrylic acid hybrid emulsion

---

| Ingredients                                                  | Relative amount (%) |
|--------------------------------------------------------------|---------------------|
| 70% Epoxy ester (intermediate)                               | 41%                 |
| Propylene glycol methyl ether                                | 5.7%                |
| Acrylic acid (AA)                                            | 5.2%                |
| 2-Ethylhexyl acrylate (2-EHA)                                | 0.82%               |
| Butyl acrylate (BA)                                          | 2.45%               |
| Methyl methacrylate (MMA)                                    | 27.7%               |
| Styrene (ST)                                                 | 4.1%                |
| Phosphate ester monomer (HEMAPE)                             | 2%/4%/6%/8%         |
| Chain transfer agent ( $\alpha$ -methylstyrene linear dimer) | 0.5%                |
| Tert-butyl peroxybenzoate (DTA)                              | 0.75%               |
| Propylene glycol methyl ether                                | 1.63                |
| Propylene glycol methyl ether (PM)                           | 0.016               |
| Triethylamine (industrial grade) (101)                       | 6.62%               |

---

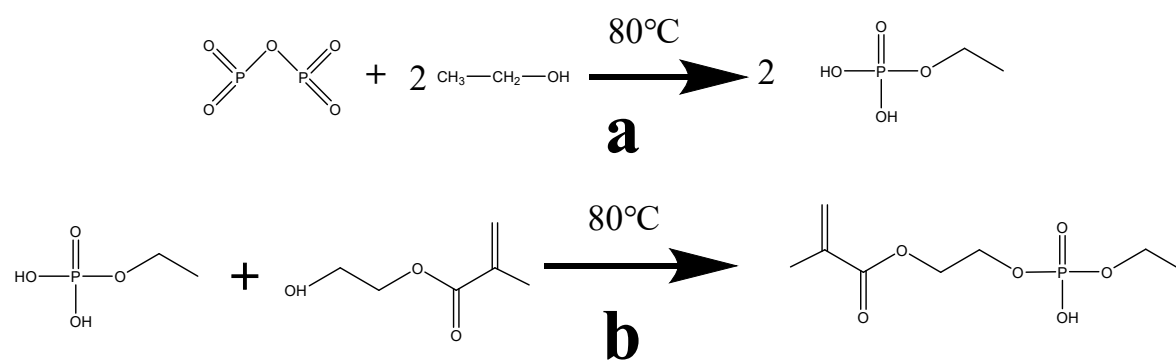

**Figure S1** Synthesis of functional phosphate monomers as shown in (a) and (b)



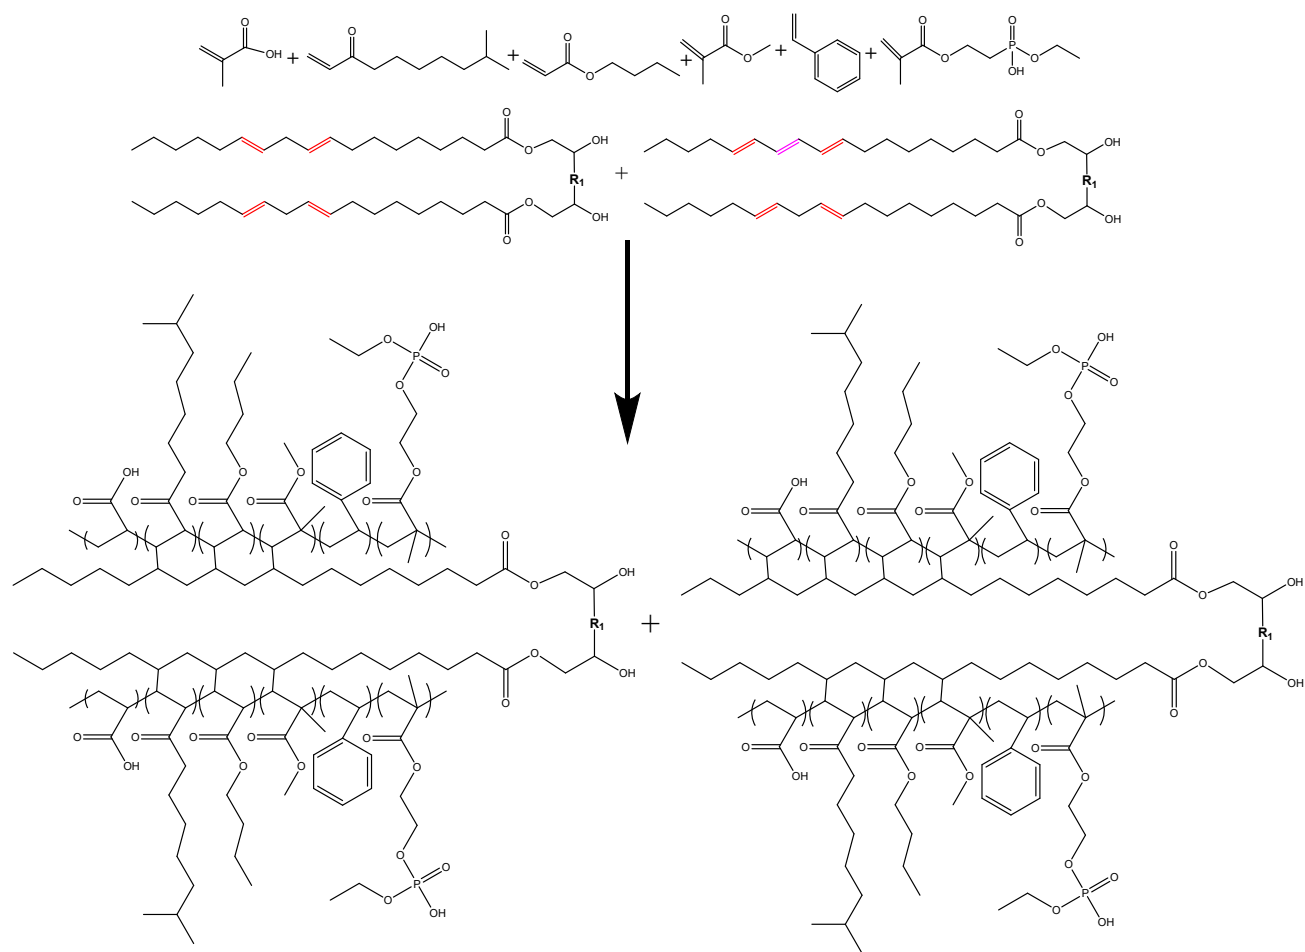

**Figure S3** Synthesis of modified waterborne acrylate epoxy ester

1.  $^{13}\text{C}$  NMR Test:

As illustrated in Figure S4,  $^{13}\text{C}$  NMR showed the signal for tertiary C atoms at 136.08 ppm and 174.29 ppm, indicating the presence of a C=O group of ester. The signal at 126.53 ppm and 18.35 ppm corresponded to  $\text{CH}_2$  and  $\text{CH}_3$ , respectively.

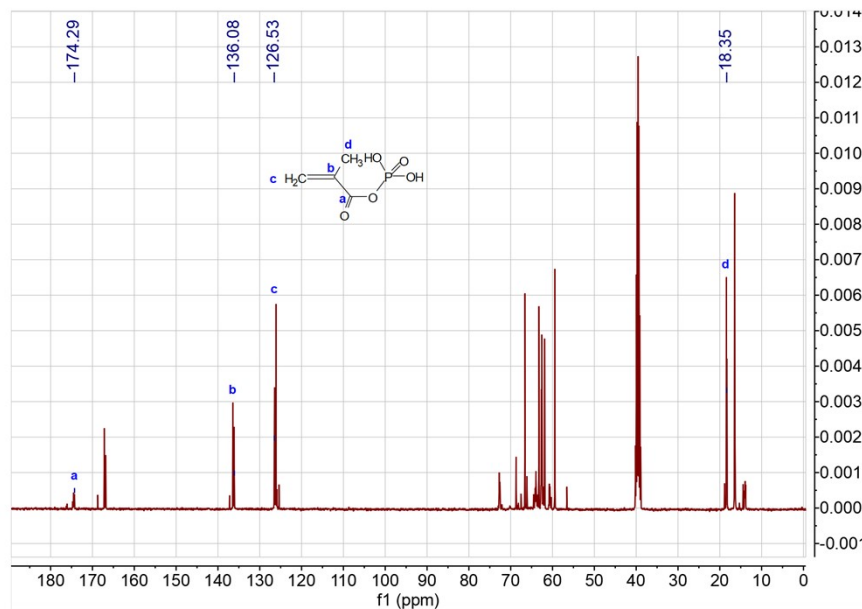

**Figure S4**  $^{13}\text{C}$  NMR of HEMAPE.

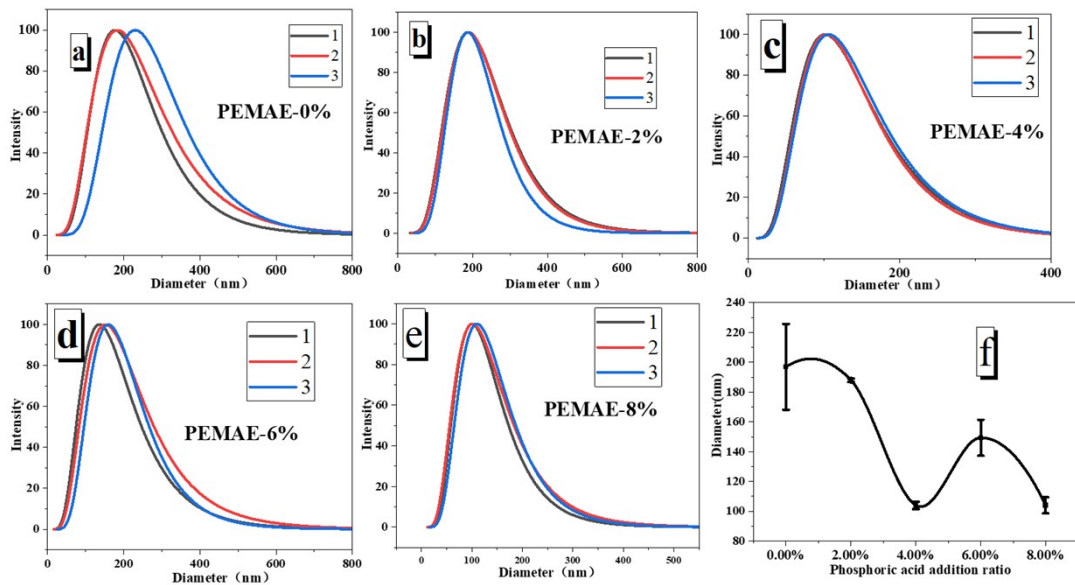

**Figure S5** (a) Particle size of HEMAPE modified resin emulsion (a) Cubic average particle size of PEMA-0% (b) Cubic average particle size of PEMA-2% (c) Cubic average particle size of PEMA-4% (d) Cubic average particle size of PEMA-6% (d) Cubic average particle size of PEMA-8%



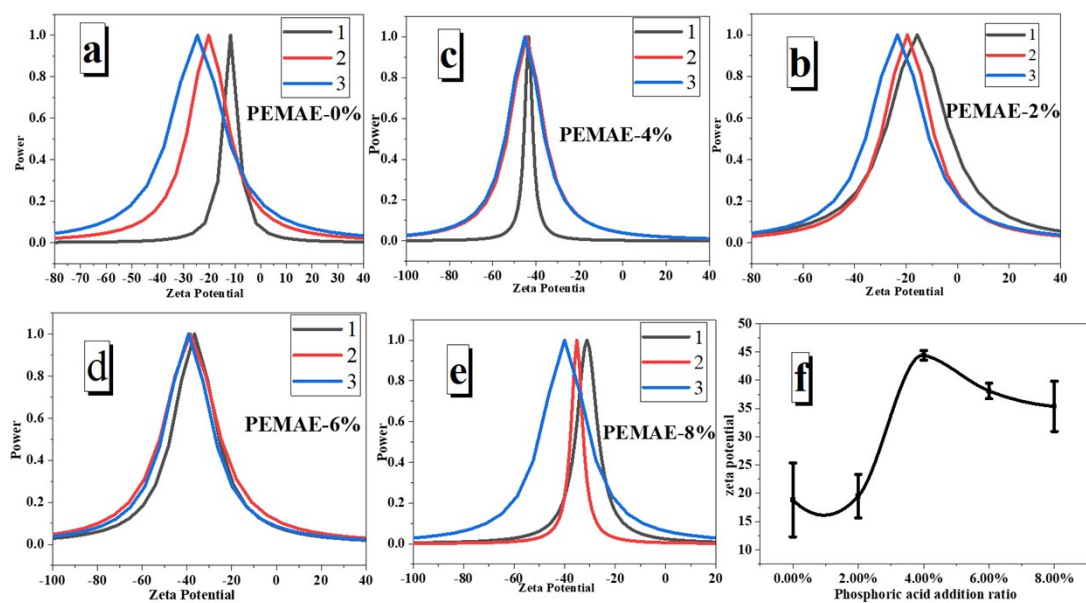

**Figure S6** Zeta potential of HEMAPE modified resin emulsion (a) PEMA-0% cubic Zeta potential (b) PEMA-2% cubic Zeta potential (c) PEMA-4% cubic Zeta potential (d) PEMA-6% cubic Zeta potential (d) PEMA-8% cubic Zeta potential (c)

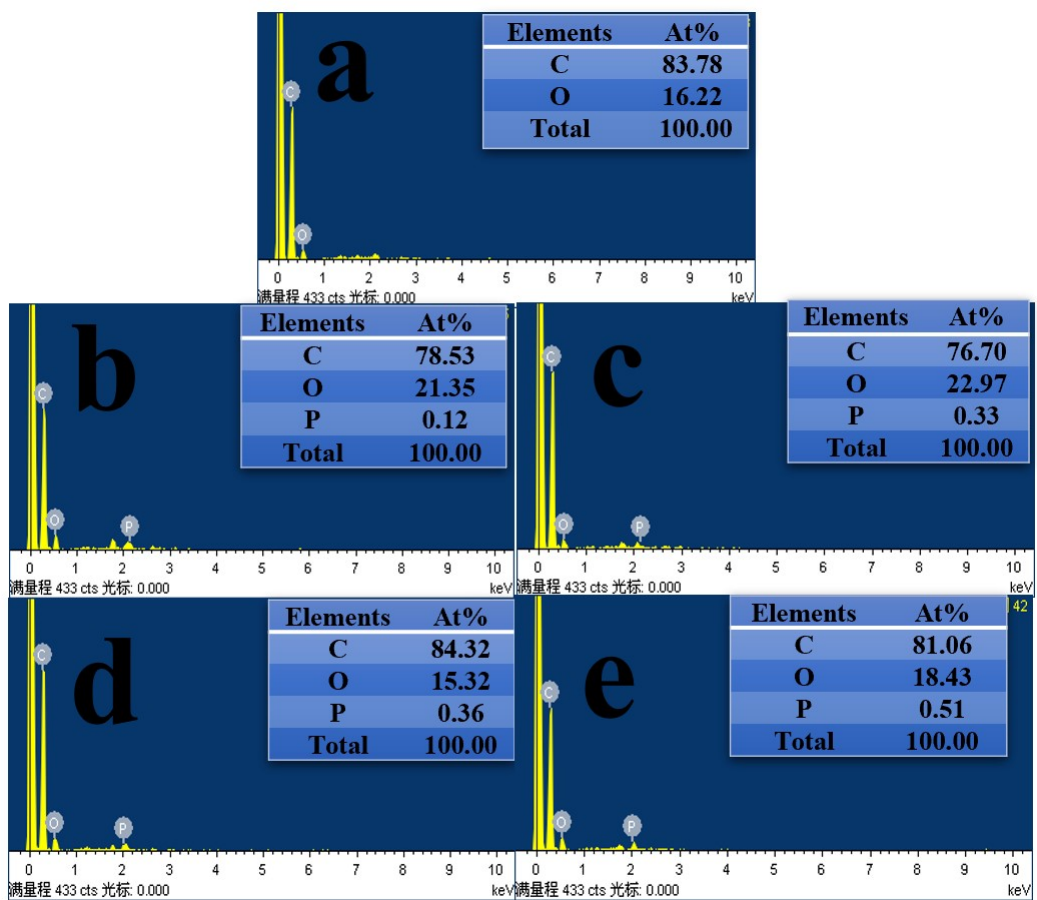

Figure S7 (a)PEWA-0%, (b)PEWA-2% , (c)PEWA-4%, (d)PEWA-6%, (e)PEWA-8% coating elements of EDS analysis.

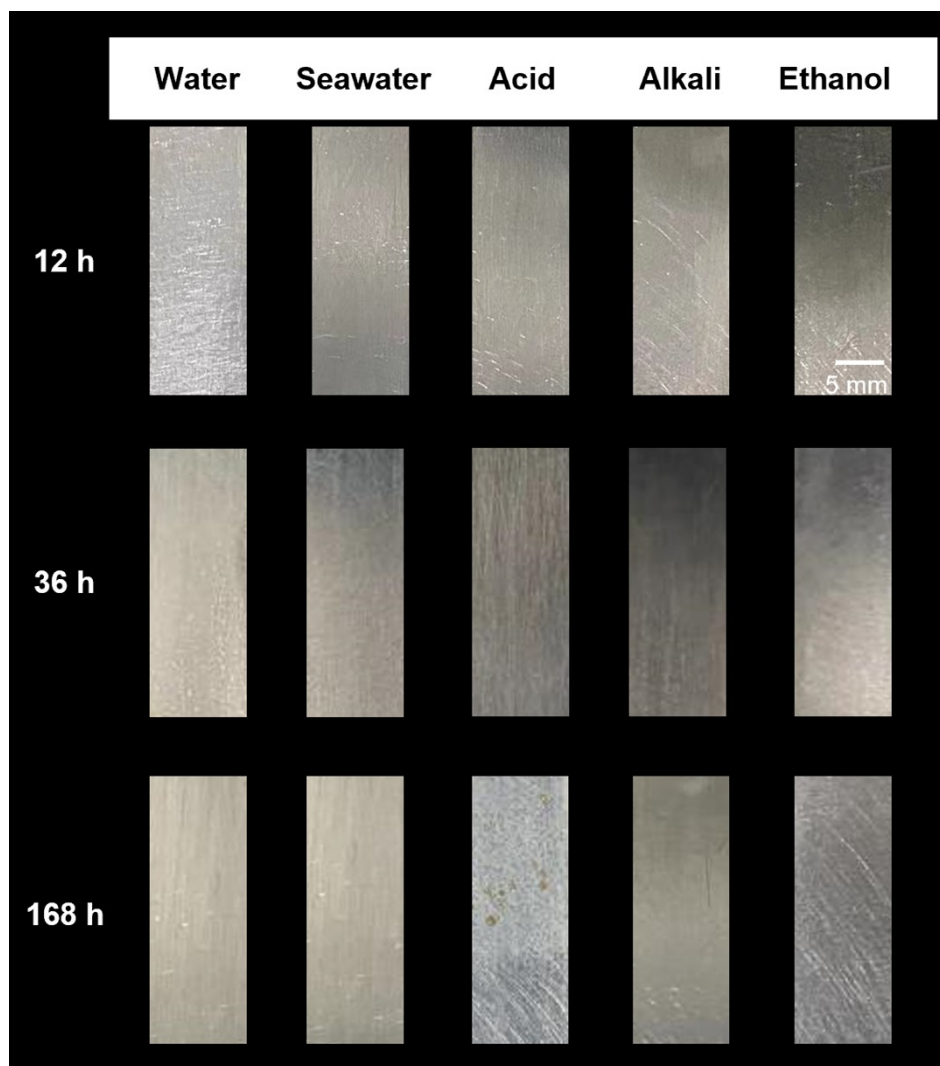

**Figure S8** Chemical stability tests of composite coatings in different solvents.

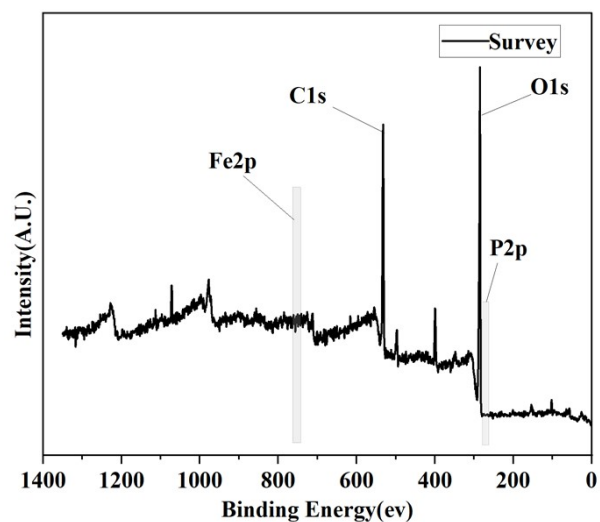

**Figure S9** Full XPS spectrum of the adhesion failure surface of the modified epoxy coating.
